1 **Light prevents pathogen-induced aqueous microenvironments via**  
2 **potentiation of salicylic acid signaling**

3

4 Gaële Lajeunesse<sup>1§</sup>, Charles Roussin-Léveillé<sup>1§</sup>, Sophie Boutin<sup>1</sup>, Élodie  
5 Fortin<sup>1</sup>, Isabelle Laforest-Lapointe<sup>1</sup>, Peter Moffett<sup>1\*</sup>

6

7 <sup>1</sup>Centre SÈVE, Département de Biologie, Université de Sherbrooke,  
8 Sherbrooke, Québec, Canada

9

10 <sup>§</sup>These authors contributed equally to this work.

11

12 \*corresponding author: [peter.moffett@usherbrooke.ca](mailto:peter.moffett@usherbrooke.ca)

13

14

15 **Abstract**

16 Upon establishment of an infection, many plant pathogens induce an aqueous  
17 microenvironment in the extracellular space of their host, resulting in water-  
18 soaked lesions. In the case of *Pseudomonas syringae* (*Pst*), this is  
19 accomplished through the activity of water-soaking effectors that stimulate  
20 abscisic acid (ABA) production and signaling, which results in stomatal closure.  
21 This reduces transpiration and induces a microenvironment favorable for  
22 bacterial growth. Stomata are also highly sensitive to environmental conditions,  
23 including light and circadian rhythm. Here, we show that a period of darkness  
24 is required for water-soaking, and that a constant light regime abrogates the  
25 water-soaking activity of *Pst* effectors. Additionally, we show that constant light  
26 induces resistance against *Pst* and that this effect requires salicylic acid (SA).  
27 An increase in SA production upon infection under constant light did not affect  
28 effector-induced ABA signaling, but rather abrogated ABA's ability to induce  
29 stomatal closure. Indeed, under normal diurnal light regimes, application of a  
30 SA analog is sufficient to prevent the ability of the pathogen to induce stomatal  
31 closure and a water-rich niche in the apoplast. Our results provide a novel  
32 approach to interfering with a common virulence strategy, as well as providing  
33 a physiological mechanism by which SA functions in defense against certain  
34 pathogens.

## 35 Introduction

36

37 The outcome of a plant-pathogen interaction is determined by multiple factors.  
38 These include environmental conditions, as well as plant defense mechanisms,  
39 and the ability of pathogens to avoid or overcome the latter (Cheng et al., 2019;  
40 Nishad et al., 2020). Plants encode a large variety of pattern recognition  
41 receptors that can detect microbe-associated molecular patterns (MAMPs) and  
42 induce pattern-triggered immunity (PTI) (Han, 2019; Nishad et al., 2020; Yuan  
43 et al., 2021). Early PTI responses include acidification of the apoplast,  
44 production of reactive oxygen species (ROS) and transcriptional  
45 reprogramming (Han, 2019; Nishad et al., 2020; Yuan et al., 2021). Later  
46 responses include biosynthesis of defense-related phytohormones such as  
47 salicylic acid (SA), jasmonic acid (JA) and ethylene (Nishad et al., 2020; Yuan  
48 et al., 2021). In turn, a key virulence mechanism used by pathogens is the  
49 translocation of effector proteins into host plant cells, many of which have been  
50 shown to inhibit PTI (Toruño et al., 2016). Plant pathogenic bacteria possess a  
51 needle-like structure, commonly referred to as the type-3 secretion system  
52 (T3SS), that delivers effector proteins which promote disease progression in  
53 their hosts (Collmer et al., 2000; Lee et al., 2012). However, inhibition of  
54 defense responses is not sufficient for optimal pathogen proliferation and  
55 additional effector activities are required for the establishment of favorable  
56 microenvironments in the apoplast (Gentzel et al., 2022; Hu et al., 2022b;  
57 Roussin-Léveillé et al., 2022; Xin et al., 2016, 2018).

58

59 Plant stomata are often targeted by pathogenic effector proteins or toxins as  
60 these structures represent natural breaches for pathogen entry (Melotto et al.,  
61 2006; Xin et al., 2018). Indeed, an important aspect of early response to  
62 pathogens involves stomatal immunity, wherein PTI responses result in  
63 stomatal closure (Melotto et al., 2006, 2017). To counteract stomatal immunity,  
64 *Pseudomonas syringae* (*Pst*) produces a JA-mimicking phytotoxin called  
65 coronatine (COR). COR has been reported to induce stomatal reopening to  
66 allow the pathogen to gain access to the apoplastic space (Panchal et al., 2016;  
67 Toum et al., 2016). COR appears to contribute more significantly to *Pst*  
68 virulence at night in *Arabidopsis thaliana* (hereafter, *Arabidopsis*) (Panchal et

69 al., 2016), suggesting either a time of day and/or an effect of light on bacterial  
70 interaction with stomata.

71

72 In contrast to early events in infection that promote stomatal opening,  
73 pathogens appear to induce stomatal closure in later stages (Hu et al., 2022;  
74 Roussin-Léveillé et al., 2022). A frequent feature of pathogen infection in  
75 plants is the creation of an aqueous environment in the plant apoplast, visually  
76 noticeable as water-soaked lesions, which is crucial for virulence (Xin et al.,  
77 2016). *Pst* encodes two highly conserved effector proteins, HopM1 and AvrE1,  
78 that induce water-soaking lesions (Hu et al., 2022; Roussin-Léveillé et al.,  
79 2022; Xin et al., 2016). Notably, these water-soaking effectors stimulate host  
80 abscisic acid (ABA) biosynthesis and signaling pathways to induce stomatal  
81 closure, resulting in a loss of transpiration and accumulation of water in the  
82 apoplast (Hu et al., 2022a; Roussin-Léveillé et al., 2022).

83

84 Stomatal status is strongly influenced by diurnal light cycles, and light also  
85 affects plant responses to pathogens (Carvalho & Castillo, 2018; Shah et al.,  
86 2021). Moreover, SA regulates phytochromes (PHY) proteins, which act as  
87 photoreceptors (Shah et al., 2021), and PHYA and PHYB have been reported  
88 to be required for the induction of SA-responsive genes (Genoud et al., 2002;  
89 Karpinski et al., 2003). PHYTOCHROME-INTERACTING FACTORS (PIFs) are  
90 rapidly degraded during red-light perception by PHYs and are also involved in  
91 light-dependant modulation of immune signaling (Gangappa & Kumar, 2018).  
92 Furthermore, functional circadian cycles are required to respond to many  
93 abiotic and biotic stresses (Roeber et al., 2022), including responses to  
94 infection (Karapetyan & Dong, 2018). Indeed, plant susceptibility to pathogens  
95 varies, depending on the time of day of infection (Griebel & Zeier, 2008; Zhang  
96 et al., 2013). It has been reported that plants are less susceptible in the  
97 subjective morning because defense responses are regulated by the circadian  
98 clock (Bhardwaj et al., 2011). Accumulation of SA has been reported to be  
99 circadian-gated, with levels increasing throughout the day and decreasing  
100 throughout the night (Zheng et al., 2015). Moreover, the circadian regulators  
101 CCA1 and LHY play key roles in defense against *Pst*, as they promote stomatal  
102 closure in early defense responses in a SA-dependant manner (Zhang et al.,

103 2013). However, as circadian cycles are tightly linked to light perception, it is  
104 important to determine if a given phenomenon is related to the presence of light  
105 or to circadian mechanisms *per se*.

106

107 In this study, we report a novel role for light in modulating plant defense  
108 responses. Constant light treatment prevents bacterial infection by abrogating  
109 the ability of *Pst* to induce stomatal closure, thereby inhibiting the accumulation  
110 of water in the apoplast. This effect is due to a potentiation of SA signaling,  
111 which induces a stomatal opening activity that dominates over ABA. In addition  
112 to highlighting the interplay between abiotic and biotic stress, our results shed  
113 light on a physiological mechanism by which SA contributes to plant defense  
114 against pathogens.

115

## 116 **Results**

117

### 118 **Constant light confers protection against *Pseudomonas syringae***

119

120 To study the influence of light on the outcome of a bacterial infection in plants,  
121 we evaluated the virulence of *Pst* on *Arabidopsis thaliana* Col-0 wild-type (WT)  
122 plants under different light regimes. Plants were grown under 12 hours  
123 light/dark cycles before being challenged with *Pst* and placed under either  
124 constant light (LL), 12 hours light/dark (LD) or constant dark (DD) regimes for  
125 three days. We found that *Pst*-infected *Arabidopsis* plants kept in LL showed a  
126 drastic reduction in disease symptoms compared to those kept in LD or DD  
127 over the course of the infection (Fig. 1a). This observation was reflected in  
128 bacterial titers, as plants kept under LL accumulated 10-fold less *Pst* compared  
129 to other conditions (Fig. 1b). Interestingly, constant light had no additional  
130 protective effect against *Pst* DC3000 *hrcC*<sup>-</sup>, which lacks a T3SS, suggesting  
131 that this regime affects effector protein actions (Fig. 1b, c).

132

133 Circadian rhythms and light regulation have been shown to impact bacterial  
134 virulence (Griebel & Zeier, 2008; Wang et al., 2011; Zhang et al., 2013).  
135 Therefore, we evaluated whether plants subjected to different light regimes for

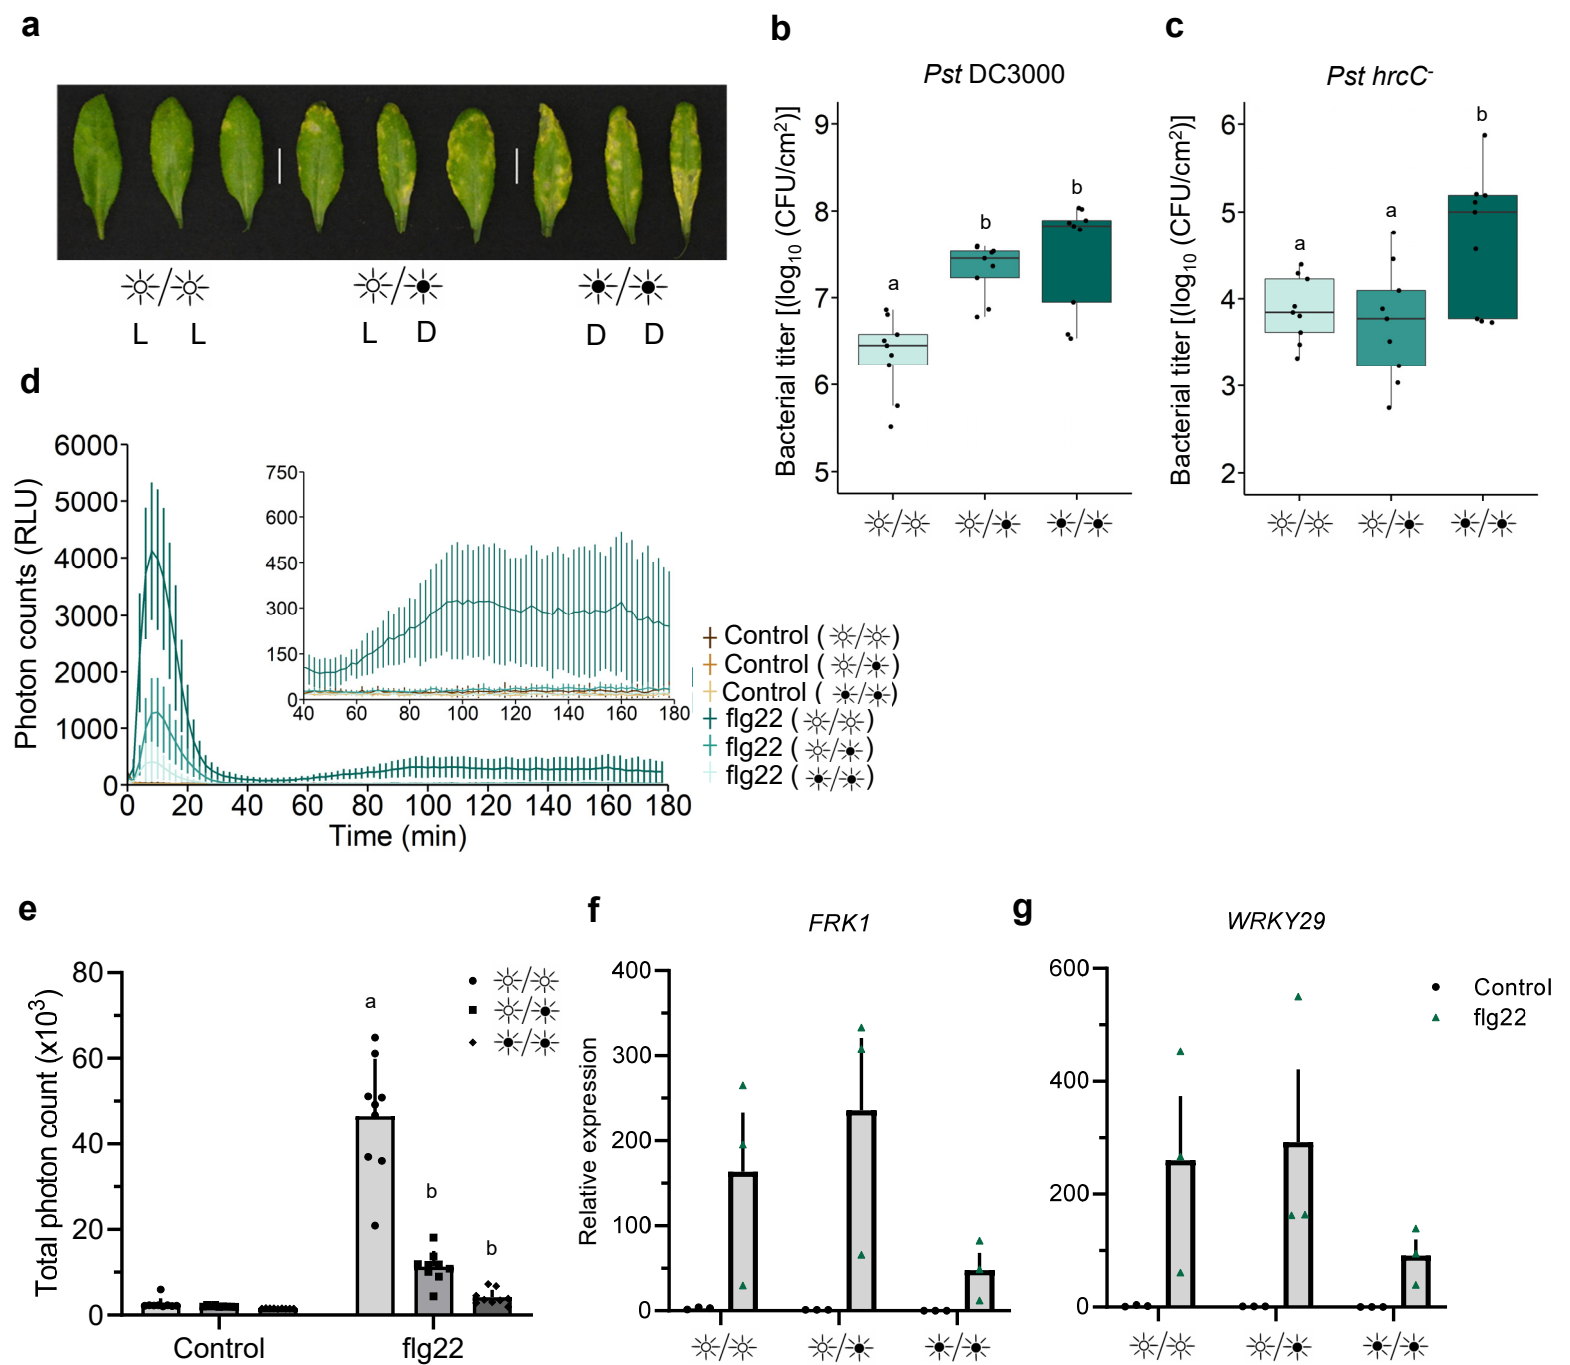

**Figure 1: Constant light confers protection against *Pst*.**

**a**, Disease phenotypes in *Arabidopsis* leaves syringe-infiltrated with *Pst* DC3000 ( $1 \times 10^5$  CFU/ml). WT Plants were either kept under constant light (LL), 12 hours light/dark (LD) or constant dark (DD) light cycles for three days after inoculation. **b-c**, Bacterial titers from WT leaves syringe-infiltrated with *Pst* DC3000 (**b**) or *Pst hrcC<sup>-</sup>* (**c**) at three days post-infection (dpi) under light regimes described in **a**. **d**, Apoplastic oxidative burst triggered by 1  $\mu$ M flg22 in WT *Arabidopsis* leaf punches. Leaf punches were kept in water under LL, LD or DD for 24 hours prior to stimulation with flg22. Values are averages  $\pm$  se ( $n=27$ ). **e**, Total photon counts measured over 180 minutes from the experiments in **d**. **f-g**, Expression levels of the early PTI marker genes *FRK1* (**f**) and *WRKY29* (**g**) treated with 1  $\mu$ M flg22 in plants that were previously placed in the indicated light setting and measured by qRT-PCR. Samples were kept under these light setting for 6 hours after control or flg22 treatment after which they were harvested. Different letters indicates statistically significant differences,  $p < 0.05$ , ANOVA (**b, c**) or  $p < 0.0001$ , ANOVA followed by Tukey's range test .

137 a 24-hour period displayed irregular modulation of immunity following treatment  
138 with the immunogenic peptide flg22. We first explored the production of  
139 apoplastic reactive oxygen species (aROS), a commonly used early marker of  
140 immune responses. We found that plants subjected to LL for 24 hours prior to  
141 treatment with flg22 produced significantly more aROS than plants kept under  
142 LD or DD regimes (Fig. 1d, e). Notably, under LL, *Arabidopsis* plants displayed  
143 a moderate, but persistent second wave of aROS, as opposed to other light  
144 conditions (Fig. 1d). In contrast, plants that were subjected to DD treatment for  
145 a single day produced much less aROS in response to flg22, compared to  
146 plants kept under LD conditions (Fig. 1e). Hence, light appears to prime  
147 *Arabidopsis* plants to produce enhanced and more sustained aROS after  
148 immune elicitation, potentially contributing to disease resistance.

149

150 We evaluated the expression of two early PTI-responsive genes, *FRK1* and  
151 *WRKY29*, to assess early PTI responsiveness. Plants were subjected to the  
152 three different light regimes for 24 hours before being challenged with flg22 for  
153 four hours. Although not significantly altered, these genes were less expressed  
154 in DD compared to LD or LL (Fig. 1f, g). Interestingly, constant light by itself  
155 was able to modulate both *FLS2* and *RBOHD* expression levels in the absence  
156 of flg22 (Fig. S1a, b). Contrary to this observation, *FLS2* and *RBOHD*  
157 expression levels were not upregulated upon flg22 treatment under constant  
158 dark (Fig. S1a, b). These results suggests that light perception and/or signaling  
159 is critical for the establishment of a proper early PTI response.

160

### 161 ***Pseudomonas syringae* requires darkness to induce water-soaking** 162 **lesions in its host**

163

164 The virulence of *Pst* is greatly enhanced by its ability to induce water-soaking  
165 lesions by closing stomata under high humidity conditions (Hu et al., 2022;  
166 Roussin-Léveillé et al., 2022). As light modulates stomatal aperture (Matthews  
167 et al., 2020), we questioned whether a pathogen's ability to induce stomatal  
168 closure could be affected by diurnal light oscillations. We observed that, under  
169 LL conditions, *Pst* could no longer induce water-soaking lesions in *Arabidopsis*

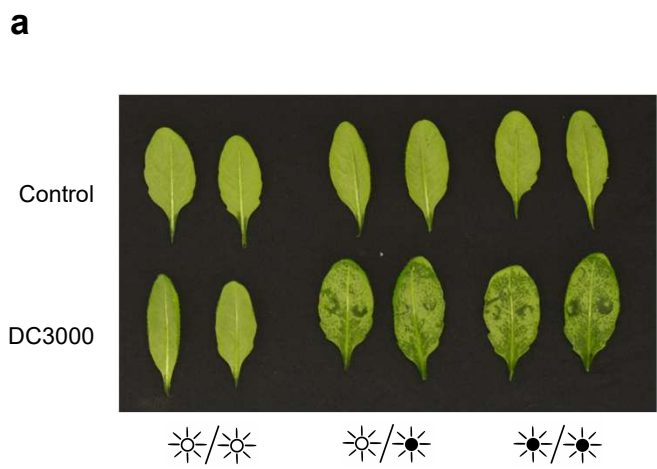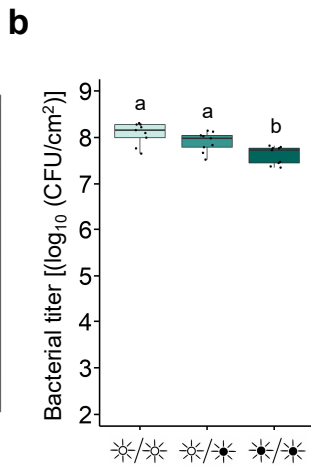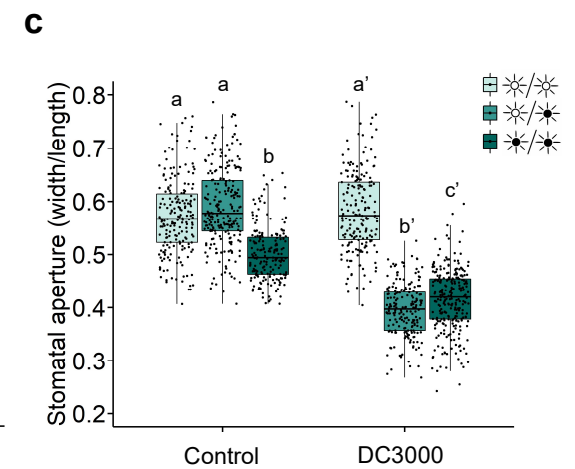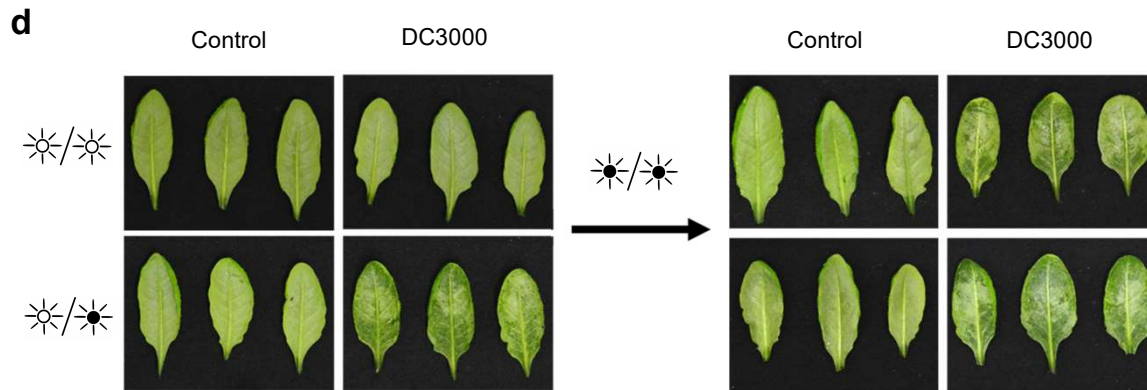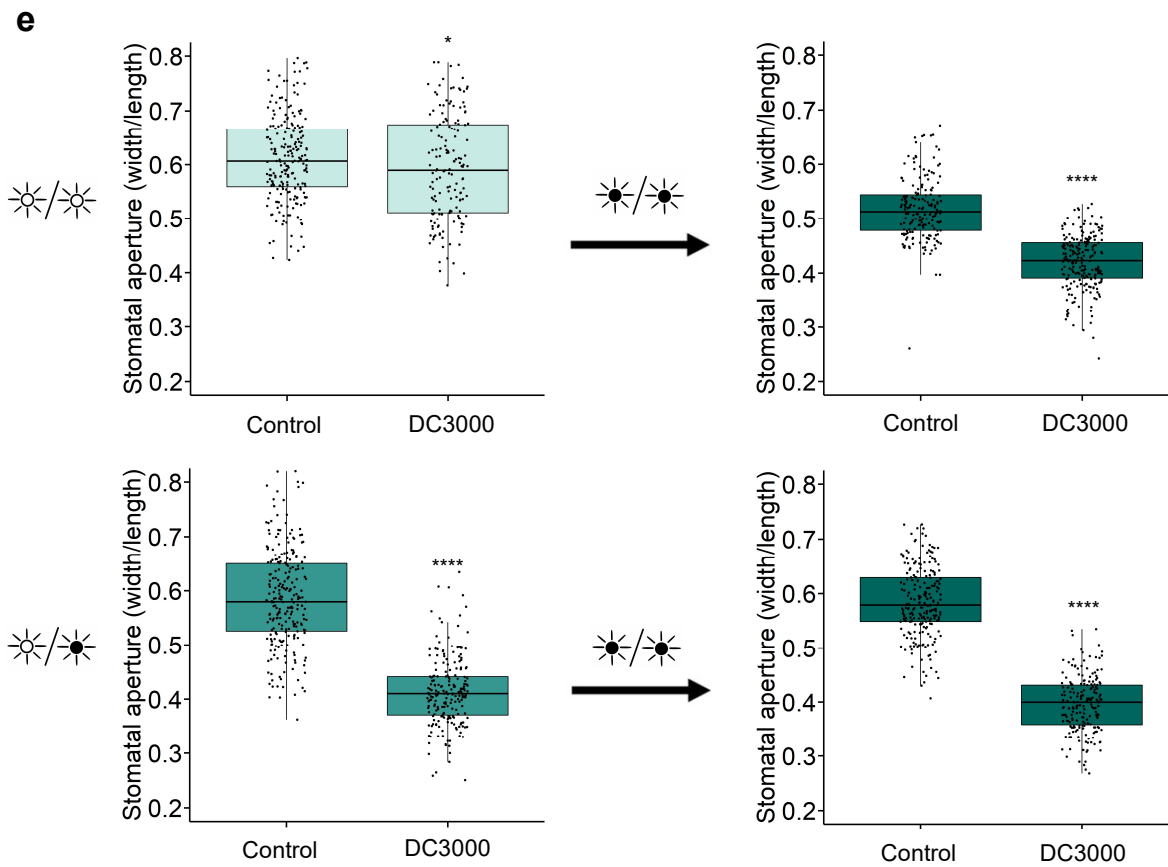

**Figure 2: *Pst* requires darkness to induce stomatal closure and water-soaking**

**a**, Water-soaking phenotypes in *Arabidopsis* leaves syringe-infiltrated with *Pst* DC3000 ( $1 \times 10^8$  CFU/ml) at 24 hpi under LL, LD or DD conditions. **b**, Bacterial titers from plants described in **a**. **c**, Stomatal aperture measurements in plants described in **a** ( $n > 150$  stomata) by epifluorescent microscopy. **d**, Water-soaking phenotypes in *Arabidopsis* leaves that were syringe-infiltrated with *Pst* DC3000 ( $1 \times 10^8$  CFU/ml) at 24 hpi under LL or LD conditions (left panel) and in plants treated in the same way followed by transferred to DD for 6 hours (right panel). **e**, Stomatal aperture measurements from leaves treated as in **d** ( $n > 150$  stomata). Different letters indicate statistically significant differences,  $p < 0.05$ , ANOVA (**b**) or Kruskal-Wallis test (**c**). Asterisks indicate statistically significant differences compared to control, \*  $p < 0.05$ , \*\*\*\*  $p < 2.2 \times 10^{-16}$ , Student's t test (**e**, upper right panel) or Wilcoxon-Mann Whitney test (**e**, upper left, lower right and lower left panels).

171

172 leaves, in contrast to LD or DD (Fig. 2a). The latter was not due to differences  
173 in levels of bacteria, as inoculations were carried with a high concentration of  
174 bacteria ( $1 \times 10^8$  CFU/ml) (Fig. 2b). Consistent with the lack of water soaking,  
175 we found that stomata of inoculated *Arabidopsis* plants kept under LL  
176 conditions were still fully open 24 hours post inoculation (Fig. 2c). In contrast,  
177 stomata of inoculated plants kept under LD conditions were closed, as  
178 expected, as were those of plants kept under DD conditions (Fig. 2c).

179

180 To consolidate our findings, we designed an experiment where *Arabidopsis*  
181 plants were infected with *Pst* and either kept under LL or LD conditions for the  
182 first 16 hours of the infection. At this timepoint, LD, but not LL treated plants  
183 underwent water soaking (Fig. 2d). Plants were then placed in darkness to  
184 determine if water soaking could be reappearing. Indeed, we found that the  
185 water-soaking phenotype could be fully restored after keeping LL treated plants  
186 in darkness for six hours (Fig. 2d). Stomatal behavior analysis further supported  
187 the observation that constant light prevents *Pst* from inducing stomatal closure,  
188 but that this phenomenon is swiftly reversed once under dark conditions (Fig.  
189 2e).

190

191 *Pst* manipulates its host ABA machinery via secretion of its conserved effectors  
192 HopM1 and AvrE1 to induce stomatal closure leading to water-soaking (Hu et  
193 al., 2022; Roussin-Léveillé et al., 2022). We designed experiments to test



194 whether a deficiency in apoplast hydration was the main reason behind reduced  
195 *Pst* aggressivity under LL. Since the *Arabidopsis aba2-1* mutant was shown to  
196 prevent *Pst*-induced water-soaked lesions (Hu et al., 2022; Roussin-Léveillé  
197 et al., 2022), we compared the bacterial levels of these plants infected under  
198 LL and LD conditions. We found that, while bacterial population levels were  
199 affected in WT plants between LL and LD conditions, they were unaltered in  
200 *aba2-1* plants (Fig. S2). Moreover, under LL, *Pst* grew to levels similar to *Pst*  
201 *hopM1/avrE1* (*h/a*), which cannot induce water-soaking (Fig. S3).  
202 Furthermore, the pathogen's ability to manipulate ABA appeared unaffected as  
203 transcript levels of the ABA biosynthesis and signaling marker genes, *NCED3*  
204 and *RD29A*, respectively, in WT infected plants were similar under all light  
205 conditions (Fig. S4). These results suggest that the lack of apoplastic fluid could  
206 at least partly explain the growth deficiency of *Pst* under LL. Thus, it appears  
207 that pathogens might benefit from natural light cycles to establish a favorable  
208 microhabitat inside their hosts.

209

### 210 **Salicylic acid is required to prevent effector-mediated induction of water-** 211 **soaking under continuous light**

212

213 Salicylic acid is a key immune component and antagonizes the molecular  
214 multiple actions driven by abscisic acid signaling (de Torres Zabala et al., 2009;  
215 Meguro & Sato, 2014; Moeder et al., 2010). However, how SA and ABA  
216 signaling interact with each other with respect to stomatal control during late  
217 phases of pathogen infection is unknown. We investigated whether plants that  
218 were subjected to a constant light cycle for 24 hours would be altered in salicylic  
219 acid (SA) signaling or accumulation. First, we analysed expression levels of SA  
220 responsive-genes, *ICS1* (*ISOCHORISMATE SYNTHASE 1*) and *PR1*  
221 (*PATHOGENESIS-RELATED PROTEIN 1*), which are often used to assess SA  
222 biosynthesis and responsiveness, respectively. We observed that the  
223 expression levels of these two genes were increased under LL conditions  
224 relative to LD or DD regimes, although the increase of *ICS1* relative expression  
225 was not significant (Fig. 3a, b). Consistent with this, we observed, using ultra  
226 performance liquid chromatography-mass spectrometry (UPLC-MS), that upon

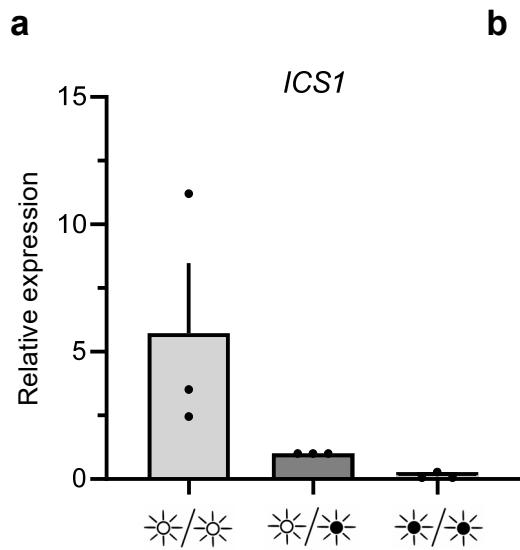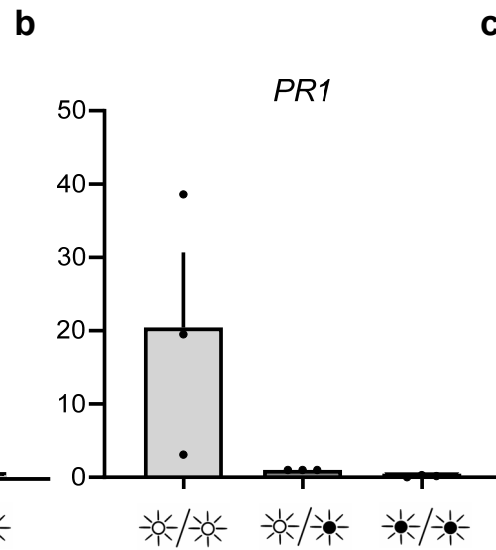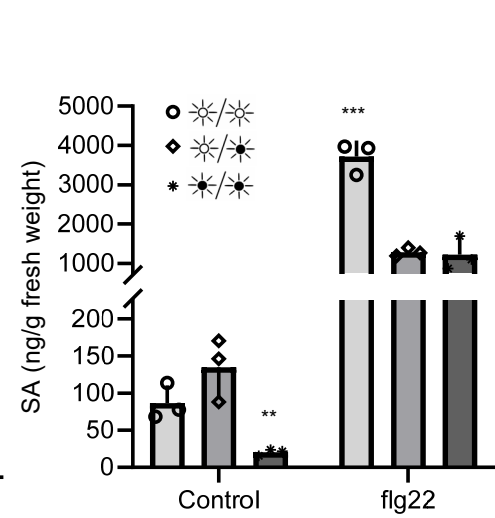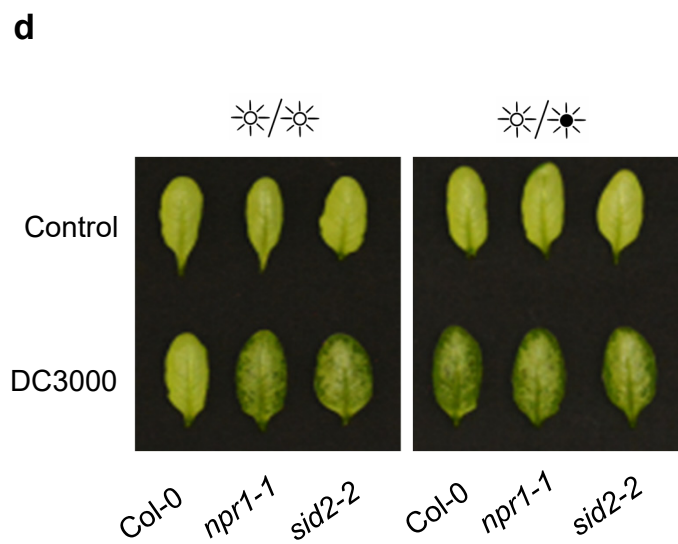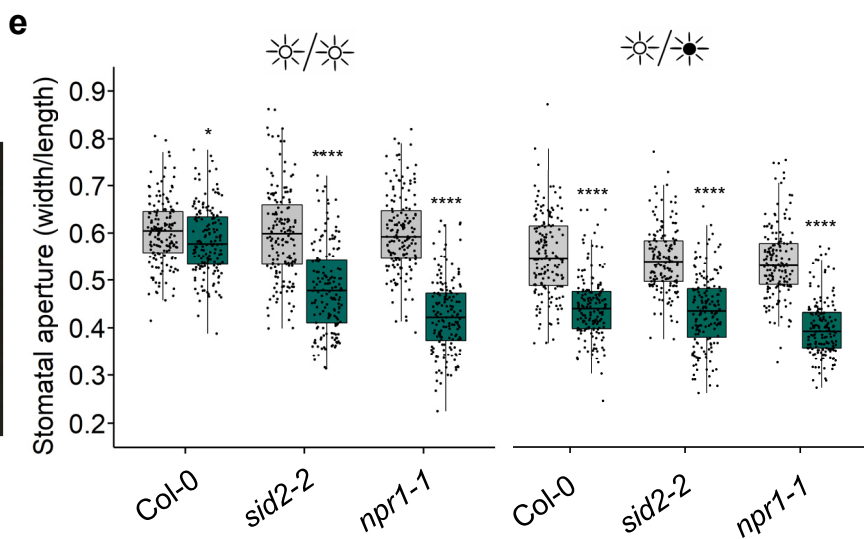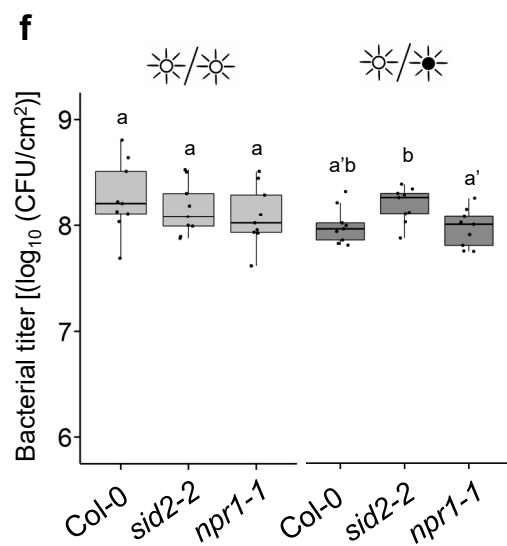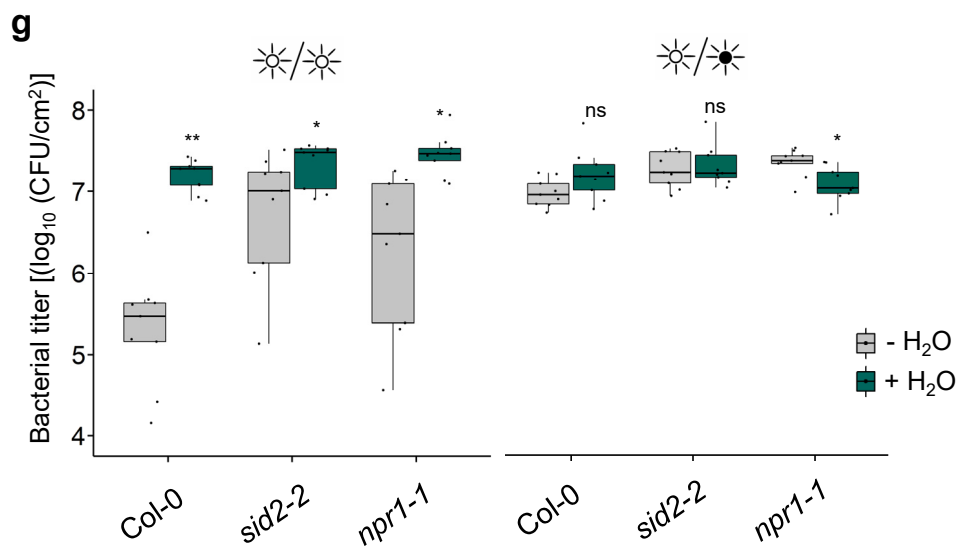

**Figure 3: Salicylic acid is required for preventing stomatal closure and disease progression under constant light.**

**a-b**, Expression levels, measured by qRT-PCR, of SA biosynthesis (*ICS1*) and signaling (*PR1*) marker genes in WT *Arabidopsis* plants treated with 1  $\mu$ M flg22 after having previously been placed in the identified light settings. Samples were harvested at 24 hpi. **c**, Quantification of SA in WT *Arabidopsis* plants mock inoculated (control) or inoculated with 1  $\mu$ M flg22 under the same experimental settings as in **a** measured by UPLC-MS at 24 hpi. **d**, Water-soaking phenotype in *Arabidopsis* WT (Col-0), *sid2* and *npr1* mutant plants syringe-infiltrated with *Pst* DC3000 ( $1 \times 10^8$  CFU/ml) at 24 hpi under LL, LD or DD. **e**, Stomatal aperture measurements from infected leaves displayed in **d** ( $n > 150$  stomata). **f**, Bacterial titers from *Arabidopsis* WT (Col-0), *sid2* and *npr1* mutant plants infected with *Pst* DC3000 ( $1 \times 10^8$  CFU/ml) at 24 hpi. **g**, Bacterial titer of *Arabidopsis* WT (Col-0), *sid2* and *npr1* mutant plants infected with *Pst* DC3000 ( $1 \times 10^5$  CFU/ml) in which infiltrated leaves were allowed to return to a pre-infiltrated state (-H<sub>2</sub>O) or in plants that were immediately domed following infiltration (+H<sub>2</sub>O). Bacterial titers were measured at 3 dpi. Asterisks indicate statistically significant differences compared to control, ns = non-significant, \*  $p < 0.05$ , \*\*  $p < 0.001$ , \*\*\*\*  $p < 2.2 \times 10^{-16}$ , ANOVA followed by Tukey's range test compared to LD (**c**), Student's t test (**e**, **f**) or Wilcoxon-Mann Witney test (**e**, **g**).

228

229 treatment with flg22, plants kept under LL conditions showed an increase in SA  
230 levels compared to LD and DD treated plants (Fig. 3c). As such, constant light  
231 appears not only to modulate early PTI responses, but also SA-related  
232 responses.

233

234 In agreement with our findings, a recent report revealed that SA-related  
235 responses are primed by photoperiodic stress (Cortleven et al., 2022).  
236 Considering that SA can antagonize ABA responses, we investigated whether  
237 SA is necessary for light-mediated prevention of water-soaked lesions. We  
238 inoculated *Arabidopsis* mutants, *npr1-1* and *sid2-2*, which are compromised in  
239 SA signaling and biosynthesis, respectively, with *Pst* under different light  
240 conditions. Interestingly, we observed water-soaking in the inoculated leaves  
241 of *npr1-1* and *sid2-2* mutant plants at 24 hours post-infection (hpi) under both  
242 LD and LL conditions, whereas wild-type plants showed water-soaking only  
243 under LD conditions (Fig. 3d). Consistent with these results, we observed that  
244 *Pst* inoculation induced stomatal closure at 24 hpi in all genotypes under LD  
245 conditions (Fig. 3e). Furthermore, apoplastic hydration was elevated in LL in  
246 SA-related mutants, but not in Col-0 under LL (Fig. S5). However, constant light

247 did not hamper the ability of the pathogen to induce stomatal closure in the  
248 *npr1-1* mutant, or (to a lesser degree) in the *sid2-2* mutant, as it does in WT  
249 plants (Fig. 3e). These altered responses were not due to differences in  
250 bacterial densities, as bacterial titers did not differ in mutant versus wild-type  
251 plants at this time point (Fig. 3f).

252

253 The impact of SA on plant responses to infection may be due to multiple effects.  
254 Given the effect of SA on water-soaking and stomatal control (Fig. 3d, e), we  
255 tested if the effect of SA might be related to the establishment of an aqueous  
256 environment, which is beneficial to bacteria. To do so, we employed an  
257 inoculation method wherein plants are immediately placed in a >95% humidity  
258 environment after inoculation without allowing liquid from the inoculum to  
259 evaporate. Under these conditions, leaves remain saturated with water,  
260 mimicking at least in part the phenomenon of water-soaking. Artificial induction  
261 of water soaking had no effect on bacterial growth of either wild-type or mutant  
262 plants under LD conditions (Fig. 3g). Keeping plants under LL conditions  
263 resulted in a dramatic decrease in bacterial growth in WT plants, while this  
264 growth defect was partially rescued in *sid2-2* and *npr1-1* mutants (Fig. 3g).  
265 Importantly, artificial water-soaking resulted in a dramatic increase of bacterial  
266 growth under LL conditions, with both WT and mutant plants showing bacterial  
267 levels similar to LD grown plants (Fig. 3g). These results indicate that the  
268 induction of resistance induced by constant light requires SA signalling and that  
269 the effects of SA are, at least in part, related to its effects on inhibiting stomatal  
270 closure. This, in turn, inhibits the pathogen's ability to create an ideal aqueous  
271 environment in the apoplast.

272

### 273 **BTH suppresses *Pst*-induced water-soaking lesions**

274

275 Benzothiadiazole (BTH) is an analog of SA and, like SA, triggers systemic  
276 acquired resistance in plants and confers protection against *Pst* (Görlach et al.,  
277 1996; Kim et al., 2022). Since SA biosynthesis and signaling are essential for  
278 preventing water-soaking under LL (Fig. 3d), we explored the potential of using  
279 BTH to prevent this phenomenon. Plants that were pre-treated with BTH 24

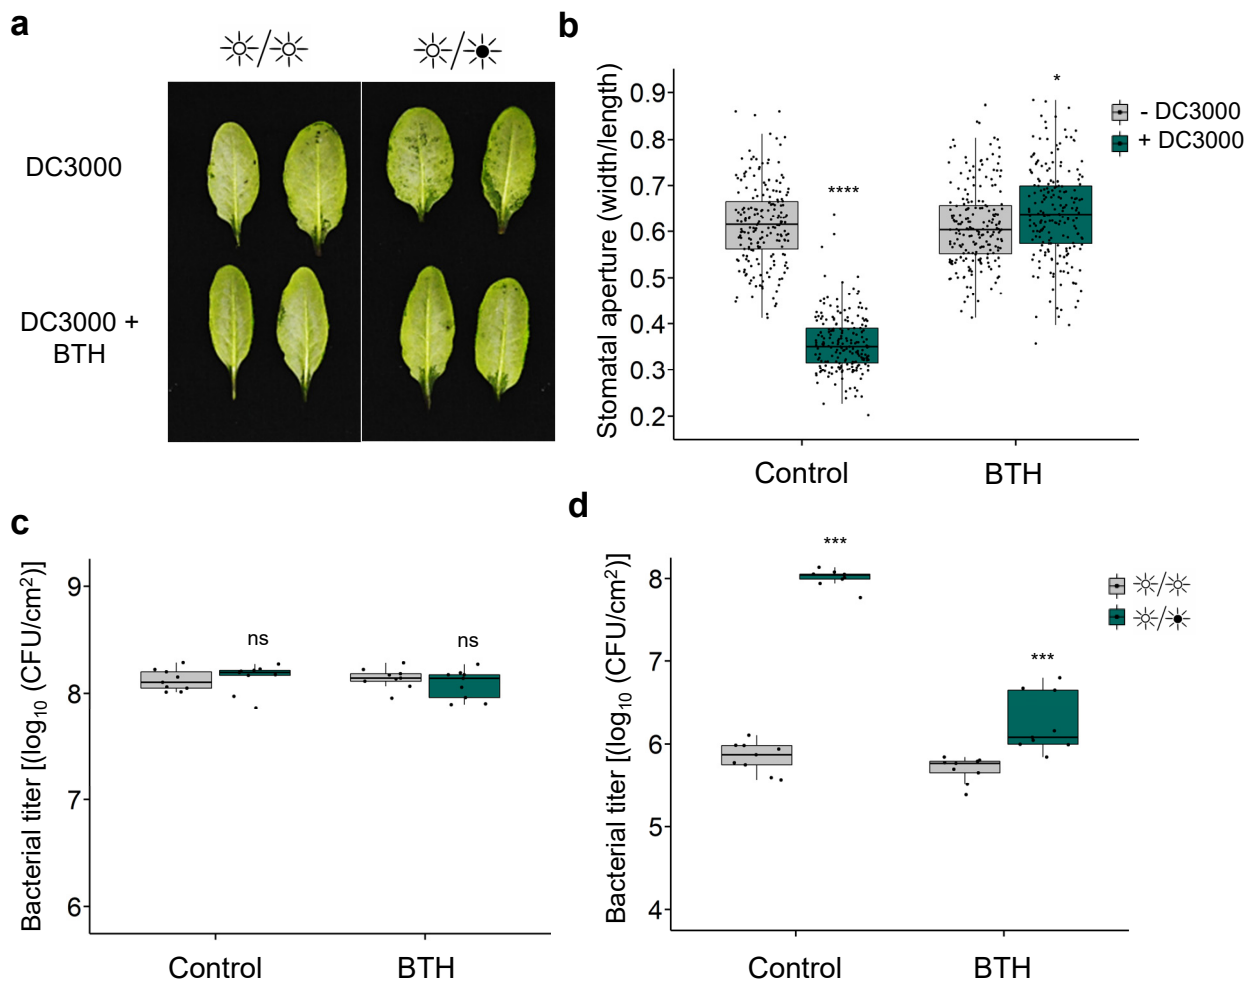

**Figure 4. BTH provides protection against bacterial-induction of water-soaking**

**a**, Water-soaking phenotypes in WT *Arabidopsis* infiltrated with DMSO (0.1%) or BTH (50  $\mu$ M) prior to syringe-infiltration with *Pst* DC3000 ( $1 \times 10^8$  CFU/ml) 24 hours later. Photos were taken 24 hours post infection. **b**, Stomatal aperture in WT *Arabidopsis* treated as in **a** and in which  $MgCl_2$  (10 mM; - DC3000) or *Pst* ( $1 \times 10^8$  CFU/ml; + DC3000) was syringe-filtrated. Plants were left under light/dark conditions and stomatal apertures assessed at 24 hours post infiltration (hpi). **c**, Bacterial titers from plants treated in **a** measured 24 hpi. **d**, Bacterial titers from *Arabidopsis* leaves that were infiltrated with DMSO (0.1%) or BTH (50  $\mu$ M) 24 hours prior to being challenged with *Pst* DC3000 ( $1 \times 10^5$  CFU/ml). Plants were placed under the indicated light conditions after infection. Bacterial titers were assessed at 3 days post infection and plants were kept under the indicated light conditions throughout the infection process. Asterisks indicate statistically significant differences compared to control, ns = non-significant, \*\*\*  $p < 0.0001$ , Student's t test (**c**) or Wilcoxon-Mann Whitney test (**d**).

**a**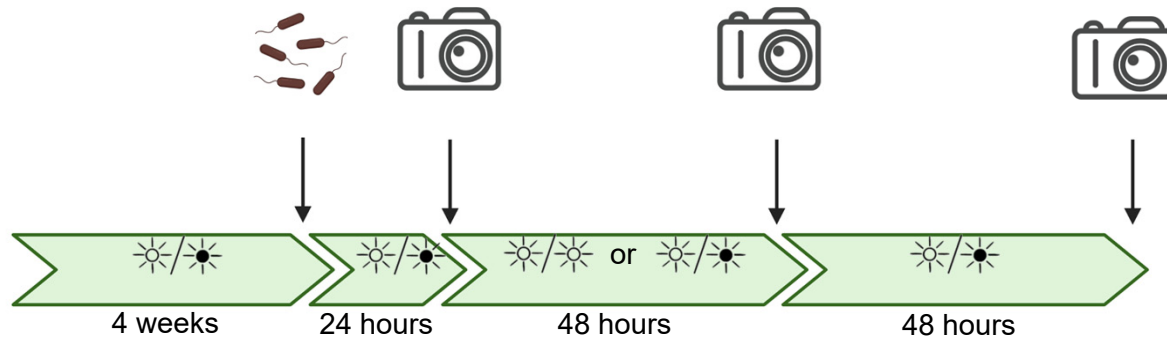**b**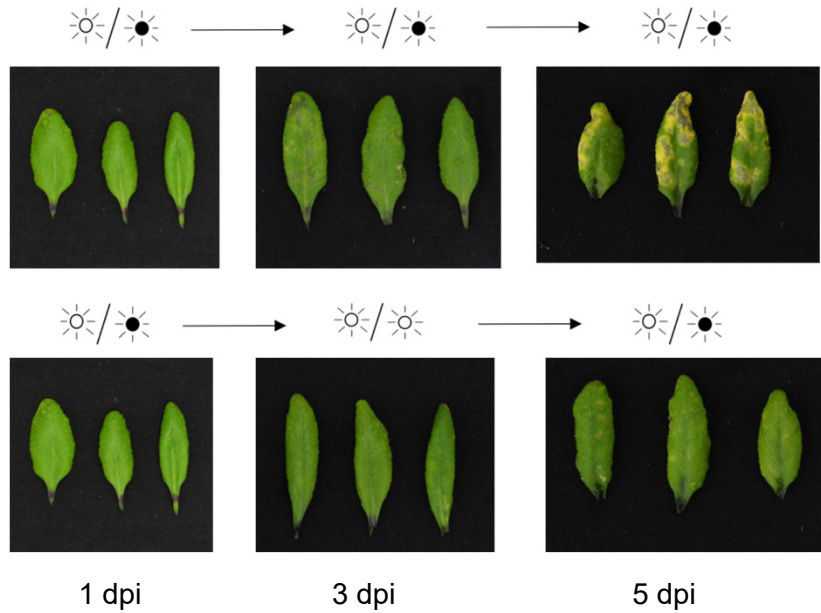**c**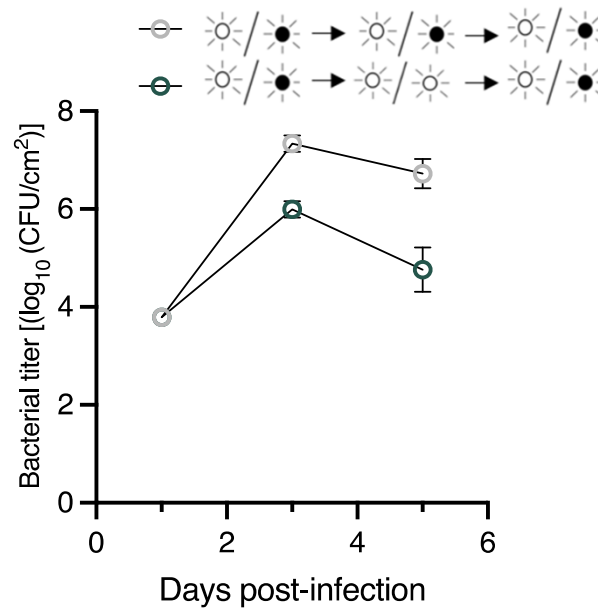

**Figure 5: Using constant light to prevent disease development**

**a**, Schematic diagram representing treatments and phenotype assessment of light-mediated disease prevention.

**b**, Disease symptoms in *Arabidopsis* plants infected with  $1 \times 10^5$  CFU/ml under different light settings, as indicated.

**c**, Bacterial titers from plants shown in **b** and harvested at the indicated timepoints.

282 hours prior to a *Pst* challenge did not display water-soaking lesions, in contrast  
283 to control-treated plants (Fig. 4a). Most importantly, BTH prevented *Pst*-  
284 induced water-soaking lesions under a LD regime, in which water-soaking  
285 lesions are normally visible. Consistent with this result, *Pst* did not induce  
286 stomatal closure in LD-grown plants pre-treated with BTH (Fig. 4b). These  
287 effects were independent of the number of bacteria, as bacterial titers in leaves  
288 did not differ between treatments at the time of stomatal evaluation (Fig. 4c).

289

290 We next tested the ability of BTH to mitigate a *Pst* infection under either LL or  
291 LD in locally pre-treated leaves. Interestingly, levels of bacteria in control or  
292 BTH pre-treated leaves were similar under constant light, suggesting that BTH  
293 does not induce more resistance than a photoperiodic stress alone (Fig. 4d).  
294 However, a clear difference was observed between control and BTH pre-  
295 treated plants under LD conditions (approx. 100-fold less bacteria). At the same  
296 time, LD-grown plants pretreated with BTH showed a protection close, albeit  
297 statistically significantly different to that accorded by growing under LL,  
298 ( $5.69 \pm 0.15$  CFU/cm<sup>2</sup> (LL);  $6.25 \pm 0.36$  CFU/cm<sup>2</sup> (LD)) (Fig. 4d). These results  
299 suggest that BTH provides protection similar to that provided by a constant light  
300 treatment, and further indicates that the effects of constant light in this context  
301 are due to the actions of SA.

302

### 303 **Constant light treatment allows plants to recover from bacterial infection**

304

305 Given the role of light in preventing disease symptoms and pathogen growth,  
306 we evaluated whether constant light could mitigate the progression of the  
307 pathogen in plants that were already infected by a pathogen. To test this, plants  
308 were inoculated and left under a LD cycle for a day to allow the pathogen to  
309 establish an infection. Plants were then transferred to LL conditions for two  
310 days, then again to a LD cycle for two additional days. Control plants were  
311 similarly inoculated but kept under a LD cycle for the whole duration of the  
312 experiment (Fig. 5a). No disease symptoms were observed on plant leaves that  
313 had been subjected to the two-day LL treatment (Fig. 5b). Bacterial titer assays  
314 were also performed and a decrease in bacterial load was observed when

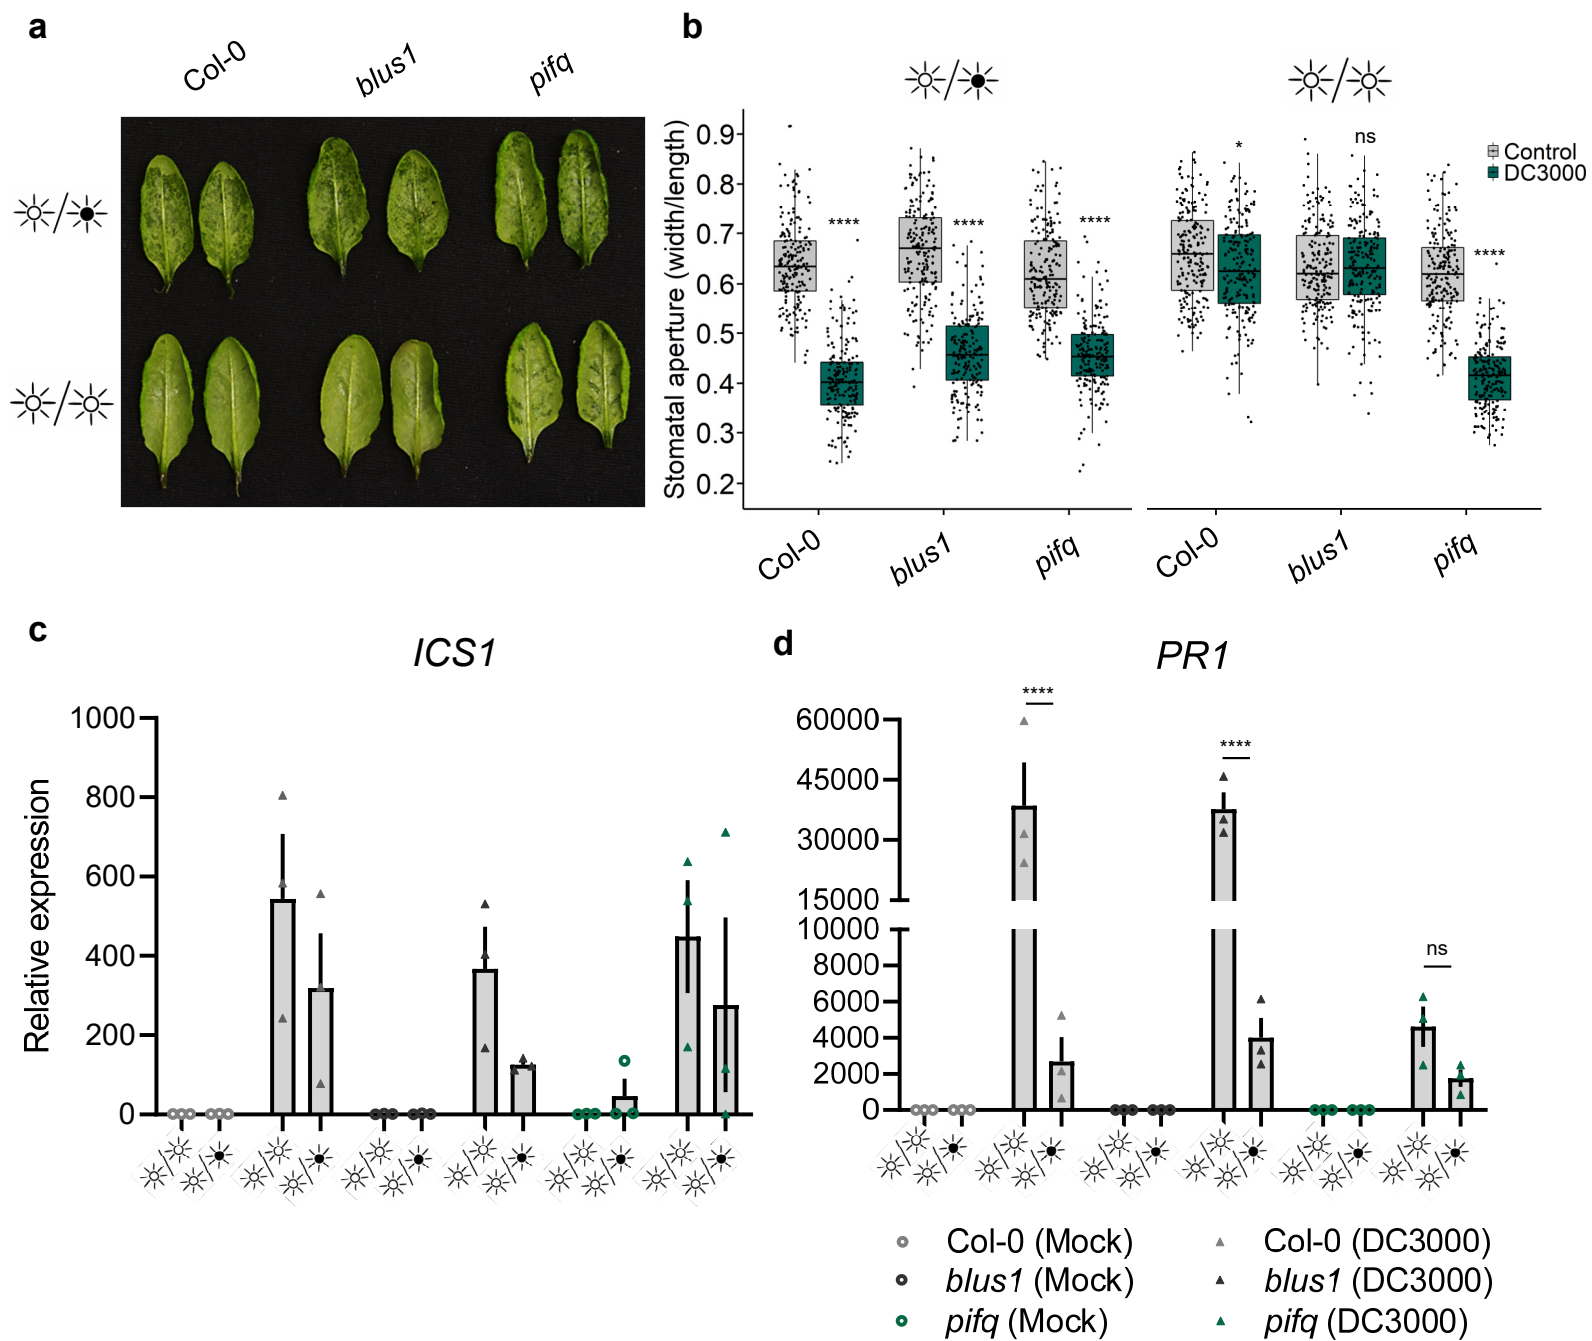

**Figure 6: Potential implication of PIFs in preventing bacterial induction of water-soaked lesions under constant light.**

**a**, Water-soaking phenotypes of *Arabidopsis* WT (Col-0), *blus1* and *pifq* mutant plants syringe-infiltrated with *Pst* 3000 ( $1 \times 10^8$  CFU/ml) under the indicated light settings. Photos were taken at 24 hours post infiltration (hpi). **b**, Stomatal aperture measurements from infected leaves displayed in **a** ( $n > 150$  stomata). **c-d**, Expression levels, assessed by qRT-PCR, of *ICS1* (**c**) and *PR1* (**d**) marker genes in *Arabidopsis* WT (Col-0), *blus1* and *pifq* mutant plants infected with *Pst* DC3000 ( $1 \times 10^8$  CFU/ml) or with control solution ( $\text{MgCl}_2$  10 mM) in plants that were placed in the identified light settings. Samples were harvested at 24 hpi. Asterisks indicate statistically significant differences compared to control, ns = non-significant, \*  $p < 0.05$ , \*\*\*\*  $p < 2.2 \times 10^{-16}$ , Wilcoxon-Mann Witney test (**b**) or \*\*\*\*  $p < 0.0001$ , Student's T-test (**d**).



316 plants were kept under LL conditions compared to plants kept under LD  
317 conditions for the whole experiment (Fig. 5c). These results suggest that  
318 constant light treatment allows plants to recover from a *Pst* infection.

319

### 320 **PIFs modulate disease resistance against *Pst* under constant light** 321 **potentially through SA signaling**

322

323 We investigated the implication of light photoreception and signaling in  
324 susceptibility to bacterial infection under LL or LD regimes. For this, we used  
325 the *Arabidopsis* blue-light insensitive (*blus1*) mutant as well as a quadruple  
326 mutant for phytochrome-interacting factors (*pifq*), which is responsible for  
327 integrating red and far/red light signaling. The *Arabidopsis blus1* mutant  
328 behaved similarly to wild-type plants in terms of water-soaking under LD and  
329 LL (Fig. 6a). However, *pifq* mutants displayed a reestablishment of water-  
330 soaked lesions 24 hours after inoculation with *Pst* (Fig. 6a). These observations  
331 were consistent with measurements of stomatal aperture, wherein only *pifq*  
332 mutants infected with *Pst* had closed stomata under constant light (Fig. 6b).  
333 Interestingly, all three genotypes showed similar increases of induction of  
334 expression of *ICS1* upon infection with *Pst*, with somewhat higher levels in LL  
335 versus LD (Fig. 6c). However, whereas WT and *blus1* plants showed much  
336 higher induction of *PR1* expression in LL versus LD, *pifq* mutant plants kept  
337 under LL conditions showed *PR1* induction similar to WT plants grown in a LD  
338 regime (Fig. 6d). Thus, the levels of *PR1* induction and stomatal closure in LL-  
339 grown *pifq* plants resemble those of LD-grown WT plants, further underlining  
340 the link between SA signaling, stomatal closure, and water-soaking. These  
341 results also suggest that PIFs might be involved in strengthening the SA module  
342 during constant light after immune elicitation.

343

### 344 **Discussion**

345

346 Induction of a water-soaked apoplast is crucial for disease development in  
347 plants (Aung et al., 2018; Peng et al., 2019; Xin et al., 2016; D. Zhang et al.,  
348 2019). In this study, we provide evidence that diurnal light cycles are intimately

349 linked with the ability of a bacterial pathogen to establish an aqueous apoplast.  
350 We show that a period of darkness is required to induce water-soaking and that  
351 constant light prevent induction of stomatal closure mediated by water-soaking  
352 effectors. Light counteracts the effects of ABA and prevents stomatal closure  
353 through potentiation of SA responses. Furthermore, BTH, a SA analog, was  
354 sufficient to prevent bacterial-induction of water-soaking lesions. Considering  
355 how common the induction of water-soaked lesions is as an initial step in  
356 microbial pathogenesis (Aung et al., 2018), finding non-invasive and easily  
357 applicable solutions to prevent them is of great practical interest.

358

359 In studies of the circadian clock machinery plants are often placed in constant  
360 light to study oscillations in gene regulation and other phenomena (Velez-  
361 Ramirez et al., 2011). As such, much of our understanding of circadian-gated  
362 regulation of phytohormone networks rely heavily on data obtained under  
363 constant light regimes (Li et al., 2018; Zheng et al., 2015; Zhou et al., 2015).  
364 However, light can affect molecular processes independently of circadian  
365 mechanisms. Indeed, *Arabidopsis* plants with mutations in key circadian cycle-  
366 regulating genes are protected against infection when grown under LL  
367 conditions compare to LD. Importantly, the degree of protection is similar to that  
368 seen with WT plants (Fig. S6a, b), suggesting that the effects of constant light  
369 are not dependant on the circadian cycle.

370

371 Our data suggest that, under constant light regimes, plant immune responses  
372 are augmented or primed. Indeed, apoplastic ROS bursts following flg22  
373 perception are more intense under LL conditions and less intense under DD  
374 (Fig. 1d). These results are consistent with the elevated levels of expression of  
375 *FLS2*, *RBOHD*, *ICS1* and *PR1* under LL conditions prior to flg22 treatment (Fig.  
376 S1, 3a, b). However, the expression of early PTI-responsive genes was not  
377 significantly altered between light conditions prior to, or after, treatment with  
378 flg22 (Fig. 1f, g). Nonetheless, consistent with increased aROS production,  
379 plants grown under LL conditions appear to respond with greater intensity to  
380 flg22 in terms of SA accumulation (Fig. 3c). How light affects the  
381 responsiveness to immune elicitors remains to be investigated. However, our

382 results showing that it affects aROS production and SA-related responses, but  
383 not early PTI responses, suggest that constant light affects specific modules in  
384 plant immunity. At the same time, our results are consistent with a recent study  
385 showing that, under photoperiodic stress, the *Arabidopsis* transcriptional  
386 signature resembles that of a response to pathogens (Cortleven et al., 2022).  
387 Notably, SA signatures were predominant in plants kept under constant light  
388 and were reduced in dark-grown plants.

389

390 It has been reported that pathogen aggressiveness is increased in infections  
391 occurring in the shade (Roberts & Paul, 2006). However, whether this involves  
392 host stomatal responses and is related to pathogen-induced water-soaking  
393 lesions has not been investigated. Diurnal light changes affect stomatal  
394 aperture, where stomata are open during the day and partially close during the  
395 night (Yang et al., 2020). As such, a synergistic interaction may occur in which  
396 the mechanism(s) behind dark-induced stomatal closure, while not well defined,  
397 may act as facilitators for effector-mediated induction of stomatal closure. It is  
398 important to note that, in infected plants, light-induced inhibition of stomatal  
399 closure and water-soaking can be swiftly reversed. That is, non-water-soaked  
400 infected plants with LL and SA-dependent open stomata undergo water-  
401 soaking after a four-hour dark treatment (Fig. 2d, e). This suggests that dark  
402 conditions may be a prerequisite for the induction of water-soaking. Current  
403 understandings on the mechanism behind darkness-induced stomatal closure  
404 suggest that ABA signaling and metabolism are important for the response  
405 speed, but not essential for closure, suggesting ABA-dependent and  
406 independent mechanisms (Pridgeon & Hetherington, 2021). Thus, we  
407 speculate that the balance in the antagonism between ABA and SA and  
408 stomatal aperture may be affected by additional mechanisms that depend on  
409 light (Fig. 7). This could include regulation of ABA levels, which increase  
410 substantially within a four-hour period of darkness (Weatherwax et al., 1996).

411

412 Water-soaking effectors of *Pst* modulate ABA-related responses (Hu et al.,  
413 2022; Roussin-Léveillé et al., 2022). The induction of expression of ABA  
414 biosynthesis and signaling pathways by *Pst* was unaltered between all light

415 regimes tested (Fig. S4). This suggests that the reported SA antagonism of  
416 ABA-related responses may be downstream of ABA responsive targets (de  
417 Torres Zabala et al., 2009; Meguro & Sato, 2015; Moeder et al., 2010). Our  
418 observations are reminiscent of a previous report showing that SA  
419 accumulation antagonizes ABA responses, including stomatal closure, even if  
420 ABA over accumulates and certain ABA-responsive genes are activated at the  
421 transcriptional level (Moeder et al., 2010). Whether SA-mediated antagonism  
422 of ABA responses is solely responsible for the pathogen's inability to induce an  
423 aqueous apoplast remains to be investigated.

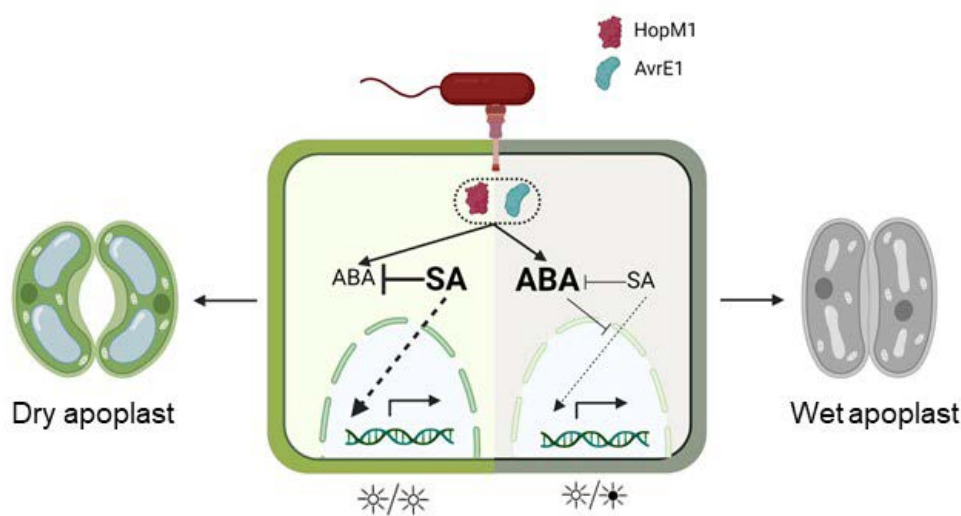

424 **Figure 7: Model for light-induced disease resistance in plants**

425

426 ABA is a major susceptibility factor to most known ABA producing or ABA  
427 inducing plant pathogens (Lievens et al., 2017). In addition to *Pst*, exposure to  
428 photoperiodic stress leads to enhanced disease resistance to the hemi-  
429 biotrophic fungus *M. oryzae* and the necrotrophic fungus *B. cinerea* present  
430 enhanced disease resistance (Cagnola et al., 2018; Shimizu et al., 2021).  
431 Interestingly, these two fungal pathogens produce ABA and induce water-  
432 soaking lesions early on during the infection process. Whether water-soaking  
433 contributes to fungal pathogenicity is not clear, but ABA was found to be a key  
434 virulence component for *M. oryzae* and *B. cinerea* (Audenaert et al., 2002;  
435 Spence et al., 2015). It is thus interesting to speculate that the reduced  
436 virulence of these fungal pathogens in plants exposed to photoperiodic stress

437 is caused by their inability to create an aqueous apoplast as well. Therefore,  
438 exposing plants to constant light for a short amount of time could be a very  
439 impactful strategy to reduce infections from pathogens from different kingdoms  
440 of life.

441

442 We are still in the dark about the specific wavelengths of light that affect the  
443 defense responses described herein. However, it has been reported that red  
444 light treatment improves resistance against *Pst* and that this treatment  
445 increased SA signaling as well as transcription of genes involved in redox  
446 homeostasis, such as *RBOH* and *GSTs* (Yang et al., 2015). Our data provides  
447 further evidence for the role of red light in mediating resistance (Pham et al.,  
448 2018), as a quadruple mutant of PIF genes, which are involved in red light  
449 signaling, is not observed in the *Arabidopsis* blue light signaling mutant *blus1*  
450 (Fig. 6a). *Arabidopsis pifq* mutant displayed less SA potentiation upon pathogen  
451 inoculation, which could be the reason behind the induction of water-soaking in  
452 this mutant. Further research will be required to dissect how red-light circuits  
453 are integrated into immune responses.

454

455 In summary, our study better defines a physiological mechanism for disease  
456 resistance and adds to the growing trend demonstrating that plant defenses  
457 involve starving pathogens for water and nutrients (Xin et al., 2016; Yamada et  
458 al., 2016). We provide a proof of concept showing that altering light conditions  
459 for relatively short periods of time can limit pathogen damage (Fig. 5) and  
460 suggest that this could have broad applications. While controlling photoperiods  
461 to prevent disease outbreaks is not as applicable for field production, this simple  
462 method could be applicable to controlled environment food production, which  
463 is growing quickly and is tightly linked to urban food sovereignty. At the same  
464 time, our current and previous work (Hu et al., 2022; Peng et al., 2019; Roussin-  
465 Léveillé et al., 2022) indicate that any treatment that leads to increased  
466 stomatal opening and transpiration leads to decreases in pathogen virulence.  
467 As such, strategies to prevent pathogen-induction of water-soaking could lead  
468 to broad-spectrum disease resistance.

469

## 470 **Materials and Methods**

471

### 472 **Plant material**

473

474 *Arabidopsis thaliana* plants were grown in Promix™ soil (PremierTech) in growth  
475 chambers either with 12 hours light/dark, 24 hours light or 24 hours dark  
476 photoperiod, with relative humidity of approximately 60% at 21°C. Light intensity  
477 was measured at 180  $\mu\text{moles}/\text{m}^2/\text{s}$  in all growth chambers when lights were on.  
478 Four- to five-week-old *Arabidopsis* plants were used for all experiments  
479 described.

480

### 481 **Bacterial disease assays**

482

483 *Pseudomonas syringae* pv. *tomato* DC3000 WT and mutant strains were  
484 cultured overnight at 28°C in Luria-Bertani (LB) media containing 50 mg/L of  
485 rifampicin. On the day of the infection, fresh LB media was inoculated with 0.5  $\mu\text{l}$   
486 of the overnight culture and bacteria were collected when  $\text{OD}_{600}$  reached  
487 between 0.8-1. Bacteria were centrifuged for 10 minutes at 4000g and the pellet  
488 resuspended in  $\text{MgCl}_2$  10 mM. Bacterial density was adjusted to 0.2 ( $1 \times 10^8$   
489 CFU/ml) prior to further dilutions. Bacterial infections were carried between  
490 14:00-15:00, or a zeitgeber time of 6:00-7:00.

491

492 All inoculations of *Arabidopsis* leaves were performed by syringe-infiltration.  
493 Infiltrated plants were all kept under ambient humidity levels for 1-2 hours to  
494 allow water to evaporate, then domed with a plastic unit to maintain high  
495 humidity (>95% RH), unless stated otherwise.

496

497 Bacterial growth *in planta* was monitored by harvesting infected *Arabidopsis*  
498 leaves, surface sterilizing in 80% ethanol and rinsing in sterile water twice.  
499 Leaf disks were taken from three leaves from the same plant (one per leaf; total  
500 of three leaf disks) using a cork borer (0.6 mm in diameter) and ground in sterile  
501 10 mM  $\text{MgCl}_2$ . Three biological replicates were performed for each experiment.  
502 Colony-forming units (CFU) were determined by making serial dilutions ( $10^0$ - $10^7$

503 e) and plating on LB plates containing 50 mg/L of rifampicin. Each dilution was  
504 plated in three technical replicates. Experiments were repeated at least three  
505 times.

506

### 507 **ROS quantification**

508

509 Leaf disks from 4-week-old *Arabidopsis* plants were collected using a 4 mm  
510 diameter biopsy punch and placed into white 96-well plates (Corning)  
511 containing 100  $\mu$ l of distilled water for 16 hours (overnight). Prior to ROS  
512 quantification, the water was removed and replaced with ROS assay solution  
513 (100  $\mu$ M Luminol [Millipore-Sigma], 20  $\mu$ g/mL horseradish peroxidase  
514 [Millipore-Sigma] with or without immune elicitors). Light emission was  
515 measured using a TECAN Spark® plate reader.

516

### 517 **Stomatal aperture assays**

518

519 Leaves were cut at the base of the petiole and immediately immersed in the  
520 stomatal fixation solution (formaldehyde 4% and rhodamine 6G 0.5  $\mu$ M) for  
521 1 minute to stop stomatal movement. A quarter of each leaf was cut with a razor  
522 blade and stomata were observed by epifluorescence microscopy. Stomatal  
523 apertures were measured using OMERO software and the degree of the  
524 stomatal opening was measured as a ratio of stomatal width to length.  
525 Between 150 to 250 stomata were measured for each data point. Data  
526 collection and analysis was performed by using double-blinded standards to  
527 avoid bias.

528

### 529 **Chemical treatments**

530

531 To assess plant immune responses, *Arabidopsis* leaves were treated with flg22  
532 (1  $\mu$ M; BioBasic Inc.) by syringe-infiltration. For BTH protection assay,  
533 *Arabidopsis* leaves were syringe-infiltrated with BTH (50  $\mu$ M; Millipore-Sigma).

534

### 535 **RNA extraction, reverse transcription, and real-time quantitative PCR**

536

537 RNA was extracted from frozen and ground leaf tissue using QIAZOL  
538 (QIAGEN) reagents, followed by on-column DNase treatment (QIAGEN),  
539 according to the manufacturer's protocol. RNA purity was assessed with a  
540 spectrophotometer and quality by gel electrophoresis. cDNA was generated by  
541 using MMuLV-RT (Service de purification des protéines – Université de  
542 Sherbrooke).

543

544 Quantitative real-time PCR was performed with a Bio-Rad CFX96 machine.  
545 Each reaction contained 1X SYBR mix (Service de purification des protéines –  
546 Université de Sherbrooke), specific primers and a 1:20 dilution of 500 ng of  
547 cDNA stock. Amplification cycle protocols were as follow: 2 min at 95°C; 40  
548 cycles of 6 seconds at 95°C and 30 seconds at 60°C. Melting curves were  
549 verified at the end of 40 cycles for confirmation of primer specificities.  
550 All reactions were repeated in three technical and biological replicates. Average  
551 Cq values were normalized by  $\Delta\Delta CT$  formula against the indicated reference  
552 gene. Oligos used in this study can be found in Table 1.

553

#### 554 **Apoplast extraction**

555

556 Three fully expanded leaves per plant from three plants were excised and  
557 apoplast extracted as previously described (Gentzel et al., 2019), with some  
558 modifications. Briefly, the initial weight of freshly excised leaves was measured  
559 before being infiltrated with distilled water and weighed again once leaves were  
560 fully saturated with water. Leaves were centrifuged at 4000 rcf in 2 ml  
561 microcentrifugation tubes containing glass beads at the bottom to prevent  
562 tissue collapse during the centrifugation. Leaves were once again weighed post  
563 centrifugation and apoplast hydration determined as previously described  
564 (Gentzel et al., 2019).

565

#### 566 **Salicylic acid extraction and quantification**

567



568 Fully expanded four-week-old *Arabidopsis* leaves were harvested and weighed  
569 for fresh weight calculation and immediately flash-freeze in liquid nitrogen.  
570 Tissues were ground with a plastic pestle and phytohormones were extracted  
571 overnight using 0.5-1 ml of ice-cold extraction buffer (methanol: water  
572 [80:20 v/v], 0.1% formic acid, 0.1 g/L butylated hydroxytoluene and 100 nM  
573 ABA-d6 as an internal standard). Extracts were filtered using centrifugal filter  
574 units.

575

576 Filtered extracts were quantified using an Acquity Ultra Performance  
577 Liquid Chromatography system (Waters Corporation, Milford, MA) as described  
578 previously (Roussin-Léveillé et al., 2022). SA was quantified based on a  
579 standard curve to calculate sample concentration (nM), which was converted  
580 to ng using the molecular weight of each specific compound and the extraction  
581 volume used. All data was normalized to initial fresh weight in grams.

582

### 583 **Statistical analysis**

584

585 Statistical analyses were performed in GraphPad Prism 8.0 for all RT-qPCR  
586 experiments, photon counts, and SA quantification. For all other experiments  
587 (bacterial counts and stomatal assays), the bioinformatic software R was used.  
588 *P* values greater than 0.05 were considered non-significant. Sample sizes,  
589 statistical tests used, and *P* values are stated in figure legends. All statistical  
590 test assumptions such as normality and homoskedasticity were tested. When  
591 not respected, non-parametric equivalent tests were performed. In multiple  
592 comparison tests, Bonferroni corrections were used.

593

594

### 595 **Acknowledgments**

596

597 This study was supported by two National Sciences and Engineering Research  
598 Council of Canada (NSERC) Discovery Grants respectively to P.M. and I.L.-L.,  
599 as well as by a Fonds de Recherche du Québec – Nature et Technologies  
600 (FRQ-NT) Team Grant and NOVA-NSERC Alliance Grant to P.M. (PI) and I.L.-  
601 L. (co-PI). I.L.-L. is also supported by a Canada Research Chair T2. G.L. was

602 supported by an Excellence Scholarship from the Faculty of Science of  
603 Université de Sherbrooke and by a Canada Graduate Scholarship (NSERC-  
604 MSc). C.R.-L. was supported by a VoiceAge excellence fellowship and an FRQ-  
605 NT PhD scholarship.

606

#### 607 **Author contributions**

608

609 C.R.-L. and P.M. conceived the study. G.L. and C.R.-L. performed all  
610 experiments, data analysis and the creation of figures. S.B. and E.F.  
611 contributed to some experiments and data collection. I.L.-L. contributed to the  
612 statistical analysis. G.L. and C.R.-L. wrote the manuscript with support from  
613 P.M. and I.L.-L. All authors revised and agreed with the content written in this  
614 manuscript.

615

#### 616 **Competing interests**

617 The authors declare no competing interests.

## 618 **References**

619

620 Audenaert, K., De Meyer, G. B., & Höfte, M. M. (2002). Abscisic acid  
621 determines basal susceptibility of tomato to *Botrytis cinerea* and suppresses  
622 salicylic acid-dependent signaling mechanisms. *Plant Physiology*, *128*(2),  
623 491-501. <https://doi.org/10.1104/pp.010605>

624

625 Aung, K., Jiang, Y., & He, S. Y. (2018). The role of water in plant–microbe  
626 interactions. *The Plant Journal*, *93*(4), 771-780.  
627 <https://doi.org/10.1111/tpj.13795>

628

629 Bhardwaj, V., Meier, S., Petersen, L. N., Ingle, R. A., & Roden, L. C. (2011).  
630 Defence Responses of *Arabidopsis thaliana* to Infection by *Pseudomonas*  
631 *syringae* Are Regulated by the Circadian Clock. *PLOS ONE*, *6*(10), e26968.  
632 <https://doi.org/10.1371/journal.pone.0026968>

633

634 Cagnola, J. I., Cerdán, P. D., Pacín, M., Andrade, A., Rodriguez, V., Zurbriggen,  
635 M. D., Legris, M., Buchovsky, S., Carrillo, N., Chory, J., Blázquez, M. A.,  
636 Alabadi, D., & Casal, J. J. (2018). Long-Day Photoperiod Enhances Jasmonic  
637 Acid-Related Plant Defense. *Plant Physiology*, *178*(1), 163-173.  
638 <https://doi.org/10.1104/pp.18.00443>

639

640 Carvalho, S. D., & Castillo, J. A. (2018). Influence of Light on Plant-  
641 Phyllosphere Interaction. *Frontiers in Plant Science*, *9*, 1482.  
642 <https://doi.org/10.3389/fpls.2018.01482>

643

644 Cheng, Y. T., Zhang, L., & He, S. Y. (2019). Plant-Microbe Interactions Facing  
645 Environmental Challenge. *Cell Host & Microbe*, *26*(2), 183-192.  
646 <https://doi.org/10.1016/j.chom.2019.07.009>

647

648 Collmer, A., Badel, J. L., Charkowski, A. O., Deng, W.-L., Fouts, D. E., Ramos,  
649 A. R., Rehm, A. H., Anderson, D. M., Schneewind, O., Dijk, K. van, & Alfano, J.  
650 R. (2000). *Pseudomonas syringae* Hrp type III secretion system and effector  
651 proteins. *Proceedings of the National Academy of Sciences*, *97*(16),  
652 8770-8777. <https://doi.org/10.1073/pnas.97.16.8770>

653

654 Cortleven, A., Roeber, V. M., Frank, M., Bertels, J., Lortzing, V., Beemster, G.  
655 T. S., & Schmölling, T. (2022). Photoperiod Stress in *Arabidopsis thaliana*  
656 Induces a Transcriptional Response Resembling That of Pathogen Infection.  
657 *Frontiers in Plant Science*, *13*, 838284.  
658 <https://doi.org/10.3389/fpls.2022.838284>

659

660 de Torres Zabala, M., Bennett, M. H., Truman, W. H., & Grant, M. R. (2009).  
661 Antagonism between salicylic and abscisic acid reflects early host-pathogen  
662 conflict and moulds plant defence responses. *The Plant Journal: For Cell and*  
663 *Molecular Biology*, *59*(3), 375-386. <https://doi.org/10.1111/j.1365-313X.2009.03875.x>

665

666 Gangappa, S. N., & Kumar, S. V. (2018). DET1 and COP1 Modulate the  
667 Coordination of Growth and Immunity in Response to Key Seasonal Signals in

- 668 *Arabidopsis*. *Cell Reports*, 25(1), 29-37.e3.  
669 <https://doi.org/10.1016/j.celrep.2018.08.096>  
670
- 671 Genoud, T., Buchala, A. J., Chua, N.-H., & Métraux, J.-P. (2002). Phytochrome  
672 signalling modulates the SA-perceptive pathway in *Arabidopsis*. *The Plant*  
673 *Journal*, 31(1), 87-95. <https://doi.org/10.1046/j.1365-313X.2002.01338.x>  
674
- 675 Gentzel, I., Giese, L., Ekanayake, G., Mikhail, K., Zhao, W., Cocuron, J.-C.,  
676 Alonso, A. P., & Mackey, D. (2022). Dynamic nutrient acquisition from a  
677 hydrated apoplast supports biotrophic proliferation of a bacterial pathogen of  
678 maize. *Cell Host & Microbe*, 30(4), 502-517.e4.  
679 <https://doi.org/10.1016/j.chom.2022.03.017>  
680
- 681 Gentzel, I., Giese, L., Zhao, W., Alonso, A. P., & Mackey, D. (2019). A Simple  
682 Method for Measuring Apoplast Hydration and Collecting Apoplast Contents.  
683 *Plant Physiology*, 179(4), 1265-1272. <https://doi.org/10.1104/pp.18.01076>  
684
- 685 Görlach, J., Volrath, S., Knauf-Beiter, G., Hengy, G., Beckhove, U., Kogel, K.  
686 H., Oostendorp, M., Staub, T., Ward, E., Kessmann, H., & Ryals, J. (1996).  
687 Benzothiadiazole, a novel class of inducers of systemic acquired resistance,  
688 activates gene expression and disease resistance in wheat. *The Plant Cell*,  
689 8(4), 629-643. <https://doi.org/10.1105/tpc.8.4.629>  
690
- 691 Griebel, T., & Zeier, J. (2008). Light regulation and daytime dependency of  
692 inducible plant defenses in *Arabidopsis*: Phytochrome signaling controls  
693 systemic acquired resistance rather than local defense. *Plant Physiology*,  
694 147(2), 790-801. <https://doi.org/10.1104/pp.108.119503>  
695
- 696 Han, G.-Z. (2019). Origin and evolution of the plant immune system. *New*  
697 *Phytologist*, 222(1), 70-83. <https://doi.org/10.1111/nph.15596>  
698
- 699 Hu, Y., Ding, Y., Cai, B., Qin, X., Wu, J., Yuan, M., Wan, S., Zhao, Y., & Xin,  
700 X.-F. (2022). Bacterial effectors manipulate plant abscisic acid signaling for  
701 creation of an aqueous apoplast. *Cell Host & Microbe*, 30(4), 518-529.e6.  
702 <https://doi.org/10.1016/j.chom.2022.02.002>  
703
- 704 Karapetyan, S., & Dong, X. (2018). Redox and the circadian clock in plant  
705 immunity: A balancing act. *Free radical biology & medicine*, 119, 56-61.  
706 <https://doi.org/10.1016/j.freeradbiomed.2017.12.024>  
707
- 708 Karpinski, S., Gabrys, H., Mateo, A., Karpinska, B., & Mullineaux, P. M. (2003).  
709 Light perception in plant disease defence signalling. *Current Opinion in Plant*  
710 *Biology*, 6(4), 390-396. [https://doi.org/10.1016/S1369-5266\(03\)00061-X](https://doi.org/10.1016/S1369-5266(03)00061-X)  
711
- 712 Kim, J. H., Castroverde, C. D., Huang, S., Li, C., Hilleary, R., Seroka, A.,  
713 Sohrabi, R., Medina-Yerena, D., Huot, B., Wang, J., Nomura, K., Marr, S.,  
714 Wildermuth, M., Chen, T., MacMicking, J., & He, S. (2022). Increasing the  
715 resilience of plant immunity to a warming climate. *Nature*, 607, 1-6.  
716 <https://doi.org/10.1038/s41586-022-04902-y>  
717

- 718 Lee, J., Teitzel, G. M., Munkvold, K., del Pozo, O., Martin, G. B., Michelmore,  
719 R. W., & Greenberg, J. T. (2012). Type III secretion and effectors shape the  
720 survival and growth pattern of *Pseudomonas syringae* on leaf surfaces. *Plant*  
721 *Physiology*, 158(4), 1803-1818. <https://doi.org/10.1104/pp.111.190686>  
722
- 723 Li, Z., Bonaldi, K., Uribe, F., & Pruneda-Paz, J. L. (2018). A Localized  
724 *Pseudomonas syringae* Infection Triggers Systemic Clock Responses in  
725 *Arabidopsis*. *Current Biology*, 28(4), 630-639.e4.  
726 <https://doi.org/10.1016/j.cub.2018.01.001>  
727
- 728 Lievens, L., Pollier, J., Goossens, A., Beyaert, R., & Staal, J. (2017). Abscisic  
729 Acid as Pathogen Effector and Immune Regulator. *Frontiers in Plant Science*,  
730 8, 587. <https://doi.org/10.3389/fpls.2017.00587>  
731
- 732 Matthews, J. S. A., Vialet-Chabrand, S., & Lawson, T. (2020). Role of blue and  
733 red light in stomatal dynamic behaviour. *Journal of Experimental Botany*, 71(7),  
734 2253-2269. <https://doi.org/10.1093/jxb/erz563>  
735
- 736 Meguro, A., & Sato, Y. (2015). Salicylic acid antagonizes abscisic acid inhibition  
737 of shoot growth and cell cycle progression in rice. *Scientific Reports*, 4(1), 4555.  
738 <https://doi.org/10.1038/srep04555>  
739
- 740 Melotto, M., Underwood, W., Koczan, J., Nomura, K., & He, S. Y. (2006). Plant  
741 stomata function in innate immunity against bacterial invasion. *Cell*, 126(5),  
742 969-980. <https://doi.org/10.1016/j.cell.2006.06.054>  
743
- 744 Melotto, M., Zhang, L., Oblessuc, P. R., & He, S. Y. (2017). Stomatal Defense  
745 a Decade Later. *Plant Physiology*, 174(2), 561-571.  
746 <https://doi.org/10.1104/pp.16.01853>  
747
- 748 Moeder, W., Ung, H., Mosher, S., & Yoshioka, K. (2010). SA-ABA antagonism  
749 in defense responses. *Plant Signaling & Behavior*, 5(10), 1231-1233.  
750 <https://doi.org/10.4161/psb.5.10.12836>  
751
- 752 Nishad, R., Ahmed, T., Rahman, V. J., & Kareem, A. (2020). Modulation of  
753 Plant Defense System in Response to Microbial Interactions. *Frontiers in*  
754 *Microbiology*, 11.  
755 <https://www.frontiersin.org/articles/10.3389/fmicb.2020.01298>  
756
- 757 Panchal, S., Roy, D., Chitrakar, R., Price, L., Breitbach, Z. S., Armstrong, D.  
758 W., & Melotto, M. (2016). Coronatine Facilitates *Pseudomonas syringae*  
759 Infection of *Arabidopsis* Leaves at Night. *Frontiers in Plant Science*, 7, 880.  
760 <https://doi.org/10.3389/fpls.2016.00880>  
761
- 762 Peng, Z., Hu, Y., Zhang, J., Huguet-Tapia, J. C., Block, A. K., Park, S., Sapkota,  
763 S., Liu, Z., Liu, S., & White, F. F. (2019). *Xanthomonas translucens*  
764 commandeers the host rate-limiting step in ABA biosynthesis for disease  
765 susceptibility. *Proceedings of the National Academy of Sciences of the United*  
766 *States of America*, 116(42), 20938-20946.  
767 <https://doi.org/10.1073/pnas.1911660116>

768

769 Pham, V. N., Kathare, P. K., & Huq, E. (2018). Phytochromes and Phytochrome  
770 Interacting Factors. *Plant Physiology*, 176(2), 1025-1038.  
771 <https://doi.org/10.1104/pp.17.01384>

772

773 Pridgeon, A. J., & Hetherington, A. M. (2021). ABA signalling and metabolism  
774 are not essential for dark-induced stomatal closure but affect response speed.  
775 *Scientific Reports*, 11(1), 5751. <https://doi.org/10.1038/s41598-021-84911-5>

776

777 Roberts, M. R., & Paul, N. D. (2006). Seduced by the dark side : Integrating  
778 molecular and ecological perspectives on the influence of light on plant defence  
779 against pests and pathogens. *New Phytologist*, 170(4), 677-699.  
780 <https://doi.org/10.1111/j.1469-8137.2006.01707.x>

781

782 Roeber, V. M., Schmülling, T., & Cortleven, A. (2022). The Photoperiod :  
783 Handling and Causing Stress in Plants. *Frontiers in Plant Science*, 12.  
784 <https://www.frontiersin.org/articles/10.3389/fpls.2021.781988>

785

786 Roussin-Léveillé, C., Lajeunesse, G., St-Amand, M., Veerapen, V. P., Silva-  
787 Martins, G., Nomura, K., Brassard, S., Bolaji, A., He, S. Y., & Moffett, P. (2022).  
788 Evolutionarily conserved bacterial effectors hijack abscisic acid signaling to  
789 induce an aqueous environment in the apoplast. *Cell Host & Microbe*, 30(4),  
790 489-501.e4. <https://doi.org/10.1016/j.chom.2022.02.006>

791

792 Shah, A., Tyagi, S., Saratale, G. D., Guzik, U., Hu, A., Sreevathsa, R., Reddy,  
793 V. D., Rai, V., & Mulla, S. I. (2021). A comprehensive review on the influence  
794 of light on signaling cross-talk and molecular communication against phyto-  
795 microbiome interactions. *Critical Reviews in Biotechnology*, 41(3), 370-393.  
796 <https://doi.org/10.1080/07388551.2020.1869686>

797

798 Shimizu, S., Yamauchi, Y., & Ishikawa, A. (2021). Photoperiod Following  
799 Inoculation of *Arabidopsis* with *Pyricularia oryzae* (syn. *Magnaporthe oryzae*)  
800 Influences on the Plant-Pathogen Interaction. *International Journal of Molecular  
801 Sciences*, 22(9), 5004. <https://doi.org/10.3390/ijms22095004>

802

803 Spence, C. A., Lakshmanan, V., Donofrio, N., & Bais, H. P. (2015). Crucial  
804 Roles of Abscisic Acid Biogenesis in Virulence of Rice Blast Fungus  
805 *Magnaporthe oryzae*. *Frontiers in Plant Science*, 6.  
806 <https://www.frontiersin.org/articles/10.3389/fpls.2015.01082>

807

808 Toruño, T. Y., Stergiopoulos, I., & Coaker, G. (2016). Plant-Pathogen Effectors :  
809 Cellular Probes Interfering with Plant Defenses in Spatial and Temporal  
810 Manners. *Annual Review of Phytopathology*, 54(1), 419-441.  
811 <https://doi.org/10.1146/annurev-phyto-080615-100204>

812

813 Toum, L., Torres, P. S., Gallego, S. M., Benavides, M. P., Vojnov, A. A., &  
814 Gudesblat, G. E. (2016). Coronatine Inhibits Stomatal Closure through Guard  
815 Cell-Specific Inhibition of NADPH Oxidase-Dependent ROS Production.  
816 *Frontiers in Plant Science*, 7. <https://doi.org/10.3389/fpls.2016.01851>

817

- 818 Velez-Ramirez, A. I., van Ieperen, W., Vreugdenhil, D., & Millenaar, F. F.  
819 (2011). Plants under continuous light. *Trends in Plant Science*, 16(6), 310-318.  
820 <https://doi.org/10.1016/j.tplants.2011.02.003>  
821
- 822 Wang, W., Barnaby, J. Y., Tada, Y., Li, H., Tör, M., Caldelari, D., Lee, D., Fu,  
823 X.-D., & Dong, X. (2011). Timing of plant immune responses by a central  
824 circadian regulator. *Nature*, 470(7332), 110-114.  
825 <https://doi.org/10.1038/nature09766>  
826
- 827 Weatherwax, S., Ong, M. S., Degenhardt, J., Bray, E., & Tobin, E. (1996). The  
828 Interaction of Light and Abscisic Acid in the Regulation of Plant Gene  
829 Expression. *Plant physiology*. <https://doi.org/10.1104/pp.111.2.363>  
830
- 831 Xin, X.-F., Kvitko, B., & He, S. Y. (2018). *Pseudomonas syringae* : What it takes  
832 to be a pathogen. *Nature reviews. Microbiology*, 16(5), 316-328.  
833 <https://doi.org/10.1038/nrmicro.2018.17>  
834
- 835 Xin, X.-F., Nomura, K., Aung, K., Velásquez, A. C., Yao, J., Boutrot, F., Chang,  
836 J. H., Zipfel, C., & He, S. Y. (2016). Bacteria establish an aqueous living space  
837 in plants crucial for virulence. *Nature*, 539(7630), 524-529.  
838 <https://doi.org/10.1038/nature20166>  
839
- 840 Yamada, K., Saijo, Y., Nakagami, H., & Takano, Y. (2016). Regulation of sugar  
841 transporter activity for antibacterial defense in *Arabidopsis*. *Science (New York,*  
842 *N. Y.)*, 354(6318), 1427-1430. <https://doi.org/10.1126/science.aah5692>  
843
- 844 Yang, J., Li, C., Kong, D., Guo, F., & Wei, H. (2020). Light-Mediated Signaling  
845 and Metabolic Changes Coordinate Stomatal Opening and Closure. *Frontiers*  
846 *in Plant Science*, 11, 601478. <https://doi.org/10.3389/fpls.2020.601478>  
847
- 848 Yang, Y.-X., Wang, M.-M., Yin, Y.-L., Onac, E., Zhou, G.-F., Peng, S., Xia, X.-  
849 J., Shi, K., Yu, J.-Q., & Zhou, Y.-H. (2015). RNA-seq analysis reveals the role  
850 of red light in resistance against *Pseudomonas syringae* pv. *Tomato* DC3000  
851 in tomato plants. *BMC Genomics*, 16(1), 120. [https://doi.org/10.1186/s12864-](https://doi.org/10.1186/s12864-015-1228-7)  
852 [015-1228-7](https://doi.org/10.1186/s12864-015-1228-7)  
853
- 854 Yuan, M., Ngou, B. P. M., Ding, P., & Xin, X.-F. (2021). PTI-ETI crosstalk : An  
855 integrative view of plant immunity. *Current Opinion in Plant Biology*, 62, 102030.  
856 <https://doi.org/10.1016/j.pbi.2021.102030>  
857
- 858 Zhang, C., Xie, Q., Anderson, R. G., Ng, G., Seitz, N. C., Peterson, T., McClung,  
859 C. R., McDowell, J. M., Kong, D., Kwak, J. M., & Lu, H. (2013). Crosstalk  
860 between the circadian clock and innate immunity in *Arabidopsis*. *PLoS*  
861 *Pathogens*, 9(6), e1003370. <https://doi.org/10.1371/journal.ppat.1003370>  
862
- 863 Zhang, D., Tian, C., Yin, K., Wang, W., & Qiu, J.-L. (2019). Postinvasive  
864 Bacterial Resistance Conferred by Open Stomata in Rice. *Molecular Plant-*  
865 *Microbe Interactions: MPMI*, 32(2), 255-266. [https://doi.org/10.1094/MPMI-06-](https://doi.org/10.1094/MPMI-06-18-0162-R)  
866 [18-0162-R](https://doi.org/10.1094/MPMI-06-18-0162-R)  
867

868 Zheng, X.-Y., Zhou, M., Yoo, H., Pruneda-Paz, J. L., Spivey, N. W., Kay, S. A.,  
869 & Dong, X. (2015). Spatial and temporal regulation of biosynthesis of the plant  
870 immune signal salicylic acid. *Proceedings of the National Academy of Sciences*  
871 *of the United States of America*, 112(30), 9166-9173.  
872 <https://doi.org/10.1073/pnas.1511182112>

873

874 Zhou, M., Wang, W., Karapetyan, S., Mwimba, M., Marqués, J., Buchler, N. E.,  
875 & Dong, X. (2015). Redox rhythm reinforces the circadian clock to gate immune  
876 response. *Nature*, 523(7561), 472-476. <https://doi.org/10.1038/nature14449>

877
